# Supplementary material for: Quartet-based inference is statistically consistent under the unified duplication-loss-coalescence model
Source: PubMed Central journal article supplement (PMC9113308; doi:10.1093/bioinformatics/btab414), 2021-05-28
Supplement: btab414_supplementary_data.pdf [file btab414_supplementary_data.pdf]

# Quartet-Based Inference is Statistically Consistent Under the Unified Duplication-Loss-Coalescence Model

Alexey Markin  
 Virus and Prion Research Unit  
 National Animal Disease Center, USDA-ARS  
[alexey.markin@usda.gov](mailto:alexey.markin@usda.gov)

Oliver Eulenstein  
 Department of Computer Science  
 Iowa State University  
[oeulenst@iastate.edu](mailto:oeulenst@iastate.edu)

## S1 Proofs of Lemmas 3.2 and 3.3

In this section we use  $t$  to denote the edge length from the lowest duplication point (on the internal edges of  $L$ ) to the first vertex below it (as in Sections 3.1.3, 3.2.3, and 3.2.4).

*Proof of Lemma 3.2.* The statement is trivial for cases from Sections 3.2.1 (no duplications) and 3.2.2 ( $X$ -edge duplication). Therefore, we now prove the statement for cases from Sections 3.2.3 and 3.2.4.

- *Case 3.2.3* ( $Y$ -edge duplication). It is sufficient to show that  $P[a, b, c \text{ coalesced before duplication}]$  grows as  $x := \omega(X)$  grows. Consider the following relation:

$$P[a, b, c \text{ coalesced before duplication}] = g_{2,1}(x)g_{2,1}(t) + g_{2,2}(x)g_{3,1}(t).$$

Observe that for any  $x_1 > x_2$  we have  $g_{2,1}(x_1) = 1 - e^{-x_1} > 1 - e^{-x_2} = g_{2,1}(x_2)$ . Then we also have

$$g_{2,1}(x_1)g_{2,1}(t) + g_{2,2}(x_1)g_{3,1}(t) > g_{2,1}(x_2)g_{2,1}(t) + g_{2,2}(x_2)g_{3,1}(t),$$

since  $g_{2,1}(t) > g_{3,1}(t)$  and  $g_{2,1}(x) + g_{2,2}(x) = 1$  for all positive  $x$  and  $t$ .

- *Case 3.2.4* (root-edge duplication). In this case it is sufficient to prove that  $P[a, b, c, d \text{ coalesced before the duplication}]$  grows as  $x$  grows. Observe that

$$\begin{aligned} & P[a, b, c, d \text{ coalesced before the duplication}] \\ &= g_{2,1}(x)P[3 \text{ lineages coalesced on } Y \text{ and root edges before the duplication}] \\ &\quad + g_{2,2}(x)P[4 \text{ lineages coalesced on } Y \text{ and root edges before the duplication}] \\ &= g_{2,1}(x) \cdot P_3 + g_{2,2}(x) \cdot P_4. \end{aligned}$$

We introduced constants  $P_3$  and  $P_4$  above to simplify the notation.

It is now left to show that  $P_3 > P_4$  with the remainder of the proof following similarly to Case 3.2.3 above.

Note that

$$P_3 = g_{2,1}(y)g_{2,1}(t) + g_{2,2}(y)g_{3,1}(t)$$

and

$$P_4 = g_{3,1}(y)g_{2,1}(t) + g_{3,2}(y)g_{3,1}(t) + g_{3,3}(y)g_{4,1}(t).$$

Then

$$\begin{aligned}
P_3 - P_4 &= g_{2,1}(t)(g_{2,1}(y) - g_{3,1}(y)) + g_{3,1}(t)(g_{2,2}(y) - g_{3,2}(y)) - g_{4,1}(t)g_{3,3}(y) \\
&> g_{3,1}(t)(g_{2,1}(y) - g_{3,1}(y) + g_{2,2}(y) - g_{3,2}(y)) - g_{4,1}(t)g_{3,3}(t) \\
&= g_{3,1}(t)(1 - g_{3,1}(y) - g_{3,2}(y)) - g_{4,1}(t)g_{3,3}(y) \\
&> g_{4,1}(t)(1 - g_{3,1}(y) - g_{3,2}(y) - g_{3,3}(y)) = g_{4,1}(t)(1 - 1) = 0.
\end{aligned}$$

The above inequalities hold due to  $g_{2,1}(z) > g_{3,1}(z) > g_{4,1}(z)$  for any positive  $z$ .

□

*Proof of Lemma 3.3.* Observe that this statement is not trivial only in the following three cases:

- (i)  $L$  is balanced, and the lowest duplication is at the root edge (Case 3.1.3). To prove that  $P[\mathbf{ab|cd} \in G \mid L] > P[\mathbf{ac|bd} \in G \mid L]$  it is sufficient to show that

$$P[a, b, c, d \text{ coalesced before duplication}] \geq g_{4,1}(t).$$

Observe then that

$$P[a, b, c, d \text{ coalesced before duplication}] = \sum_{k=2}^4 g_{k,1}(t)P[k \text{ lineages entered the root edge}] \geq g_{4,1}(t).$$

The inequality holds since  $g_{k,1}(t) \geq g_{4,1}(t)$  for all  $k \in \{2, 3, 4\}$  and

$$\sum_{k=2}^4 P[k \text{ lineages entered the root edge}] = 1.$$

- (ii)  $L$  is a caterpillar, and the lowest duplication is on the  $Y$  edge (Case 3.2.3). In this case, it is sufficient to show that  $P[a, b, c \text{ coalesced before duplication}] \geq g_{3,1}(t)$ . Similarly to the above case, observe that

$$P[a, b, c \text{ coalesced before duplication}] = \sum_{k=2}^3 g_{k,1}(t)P[k \text{ lineages entered edge } Y] \geq g_{3,1}(t).$$

Then the inequality holds since  $g_{k,1}(t) \geq g_{3,1}(t)$  for all  $k \in \{2, 3\}$ .

- (iii)  $L$  is a caterpillar, and the lowest duplication is at the root edge (Case 3.2.4). In this case, we need to show that

$$P[a, b, c, d \text{ coalesced before the duplication}] \geq g_{3,2}(y)g_{3,1}(t) + g_{3,1}(y)g_{2,1}(t) + g_{3,3}(y)g_{4,1}(t).$$

Consider now the following relation that comes from the proof of Lemma 3.2:

$$\begin{aligned}
&P[a, b, c, d \text{ coalesced before the duplication}] \\
&= g_{2,1}(x)P[3 \text{ lineages coalesced on } Y \text{ and root edges before the duplication}] \\
&\quad + g_{2,2}(x)P[4 \text{ lineages coalesced on } Y \text{ and root edges before the duplication}] \\
&= g_{2,1}(x) \cdot P_3 + g_{2,2}(x) \cdot P_4.
\end{aligned}$$

Then, using the  $P_3$  and  $P_4$  notation, we need to show that

$$g_{2,1}(x)P_3 + g_{2,2}(x)P_4 \geq P_4.$$

Note that  $g_{2,1}(x) + g_{2,2}(x) = 1$ . Further, in the proof of Lemma 3.2 we show that  $P_3 \geq P_4$ . Then the inequality follows.

□

## S2 Proof of Lemma 4.6

*Proof.* First of all, note that for, e.g., the  $(ab, c, d)$  case to be feasible, we need to have at least three root lineages. That is,  $l \geq 3$ . Next, observe that

$$\begin{aligned} P[AB] &= P[(ab, c, d) \vee (cd, a, b)] = P[i_a = i_b, i_c \neq i_d] - P[(abc, d)] - P[(abd, c)] \\ &\quad + P[i_c = i_d, i_a \neq i_b] - P[(acd, b)] - P[(bcd, a)]; \\ P[AC] &= P[(ac, b, d) \vee (bd, a, c)] = P[i_a = i_c, i_b \neq i_d] - P[(abc, d)] - P[(acd, b)] \\ &\quad + P[i_b = i_d, i_a \neq i_c] - P[(abd, c)] - P[(bcd, a)]. \end{aligned}$$

Therefore, it is sufficient to show that

$$P[i_a = i_b, i_c \neq i_d] + P[i_c = i_d, i_a \neq i_b] \geq P[i_a = i_c, i_b \neq i_d] + P[i_b = i_d, i_a \neq i_c].$$

Let  $x := P[i_a = i_b]$  and  $y := P[i_c = i_d]$ . Recall that, by Lemma 4.1,  $x, y \geq \frac{1}{l}$ . Then,

$$P[i_a = i_b, i_c \neq i_d] + P[i_c = i_d, i_a \neq i_b] = x(1 - y) + y(1 - x) = x + y - 2xy. \quad (1)$$

Further,

$$P[i_b = i_d \mid i_a = i_c] = \sum_{j=1}^l P[i_b = i_d \mid i_a = i_c = j] P[i_a = i_c = j \mid i_a = i_c] \quad (2)$$

$$= \frac{1}{l} \sum_{j=1}^l \sum_{k=1}^l P[i_b = i_d = k \mid i_a = i_c = j] \quad (3)$$

$$= \frac{1}{l} \sum_{j=1}^l \sum_{k=1}^l P[i_b = k \mid i_a = j] P[i_d = k \mid i_c = j] \quad (4)$$

$$= \frac{1}{l} l \left( P[i_b = 1 \mid i_a = 1] P[i_d = 1 \mid i_c = 1] + \dots + P[i_b = l \mid i_a = l] P[i_d = l \mid i_c = 1] \right) \quad (5)$$

$$= xy + (l - 1) \frac{(1 - x)(1 - y)}{(l - 1)(l - 1)}. \quad (6)$$

- The transition to equality 3 is due to  $P[i_a = i_c = j \mid i_a = i_c] = \frac{P[i_a=i_c=j]}{P[i_a=i_c]} = \frac{1/l^2}{1/l} = 1/l$  (via Claims 4.1 and 4.2).
- The transition to equality 4 is due to the independence of the  $i_b$  and  $i_d$  random variables (as well as of  $i_a$  and  $i_c$ ).
- To understand the transition to equalities 5 and 6, observe that (due to the symmetry of the duplication/loss process)

$$P[i_b = k \mid i_a = k] = P[i_b = 1 \mid i_a = 1] = x$$

for any  $k$ , and

$$P[i_b = k \mid i_a = j] = P[i_b = k \mid i_a = 1] = \frac{1 - x}{l - 1}$$

for any  $k \neq 1$  and  $j \neq k$ .

Similarly, we have

$$P[i_d = k \mid i_c = k] = P[i_d = 1 \mid i_c = 1] = y$$

for any  $k$ , and

$$P[i_b = k \mid i_a = j] = P[i_b = k \mid i_a = 1] = \frac{1 - y}{l - 1}$$

for any  $k \neq 1$  and  $j \neq k$ .

Then,

$$P[i_a = i_c, i_b \neq i_d] = (1 - P[i_b = i_d \mid i_a = i_c])P[i_a = i_c] = (1 - xy - \frac{(1 - x)(1 - y)}{(l - 1)})\frac{1}{l};$$

$$P[i_a = i_c, i_b \neq i_d] + P[i_b = i_d, i_a \neq i_c] = \frac{2}{l(l - 1)}(l - 2 - lxy + x + y). \quad (7)$$

Multiplying Equations 1 and 7 by  $l(l - 1)$  and fixing some  $y \in [1/l, 1]$  we obtain two **linear** functions.

$$\begin{aligned} f(x) &:= l(l - 1)(x + y - 2xy) \\ g(x) &:= 2(l - 2 - lxy + x + y). \end{aligned}$$

It is then sufficient to show that  $f(1/l) \geq g(1/l)$  and  $f(1) \geq g(1)$  to conclude the proof (since  $x$  is in the  $[1/l, 1]$  range).

$$\begin{aligned} f(1/l) &= l - 1 + y(l - 1)(l - 2); \\ g(1/l) &= 2l - 4 - 2y + 2/l + 2y = 2l - 4 + 2/l. \end{aligned}$$

Observe that  $f(1/l)$  is minimum when  $y = 1/l$  (since that is the smallest possible value for  $y$ ). In that case  $f(1/l) = l - 1 + (l^2 - 3l + 2)/l = 2l - 4 + 2/l$ . That is,  $f(1/l) \geq g(1/l)$  for all values of  $y$ . Let us now compare  $f(1)$  and  $g(1)$ .

$$\begin{aligned} f(1) &= l(l - 1)(1 - y); \\ g(1) &= 2(l - 2 - ly + 1 + y) = 2(l - 1 - y(l - 1)) = 2(l - 1)(1 - y). \end{aligned}$$

It is then not difficult to see that  $f(1) \geq g(1)$  for all  $l \geq 3$ . □
